# Supplementary material for: A peroxochromium complex, TpiPr2Cr(O2)2, obtained by oxidative dehydrative condensation between a dihydroxochromium complex and H2O2 [TpiPr2 = hydrotris(3,5-diisopropylpyrazolyl)borato]Electronic supplementary information (ESI) available: Atomic numbering schemes. See http://www.rsc.org/suppdata/dt/b3/b309762e/
Source: Royal Society of Chemistry journal article supplement (doi:10.1039/b309762e), 2003-01-01
Supplement: b309762e.pdf [file b309762e.pdf]

## List of Electronic Supporting Information

**A Peroxochromium Complex,  $\text{Tp}^{\text{iPr}_2}\text{Cr}(\text{O}_2)_2$ , Obtained by Oxidative Dehydrative Condensation Between a Dihydroxochromium Complex and  $\text{H}_2\text{O}_2$  [ $\text{Tp}^{\text{iPr}_2} =$  hydrotris(3,5-diisopropylpyrazolyl)borato].**

Ken-ichiro Sugawara, Shiro Hikichi,\*† and Munetaka Akita\*

*Chemical Resources Laboratory, Tokyo Institute of Technology, 4259 Nagatsuta, Midori-ku, Yokohama 226-8503, Japan*

|                                                   |   |                                                    |   |
|---------------------------------------------------|---|----------------------------------------------------|---|
| Figure S1. Atomic numbering scheme for <b>3</b> . | 1 | Figure S5. Atomic numbering scheme for <b>9</b> .  | 3 |
| Figure S2. Atomic numbering scheme for <b>4</b> . | 1 | Figure S6. Atomic numbering scheme for <b>10</b> . | 3 |
| Figure S3. Atomic numbering scheme for <b>5</b> . | 2 | Figure S7. Atomic numbering scheme for <b>11</b> . | 4 |
| Figure S4. Atomic numbering scheme for <b>7</b> . | 2 |                                                    |   |

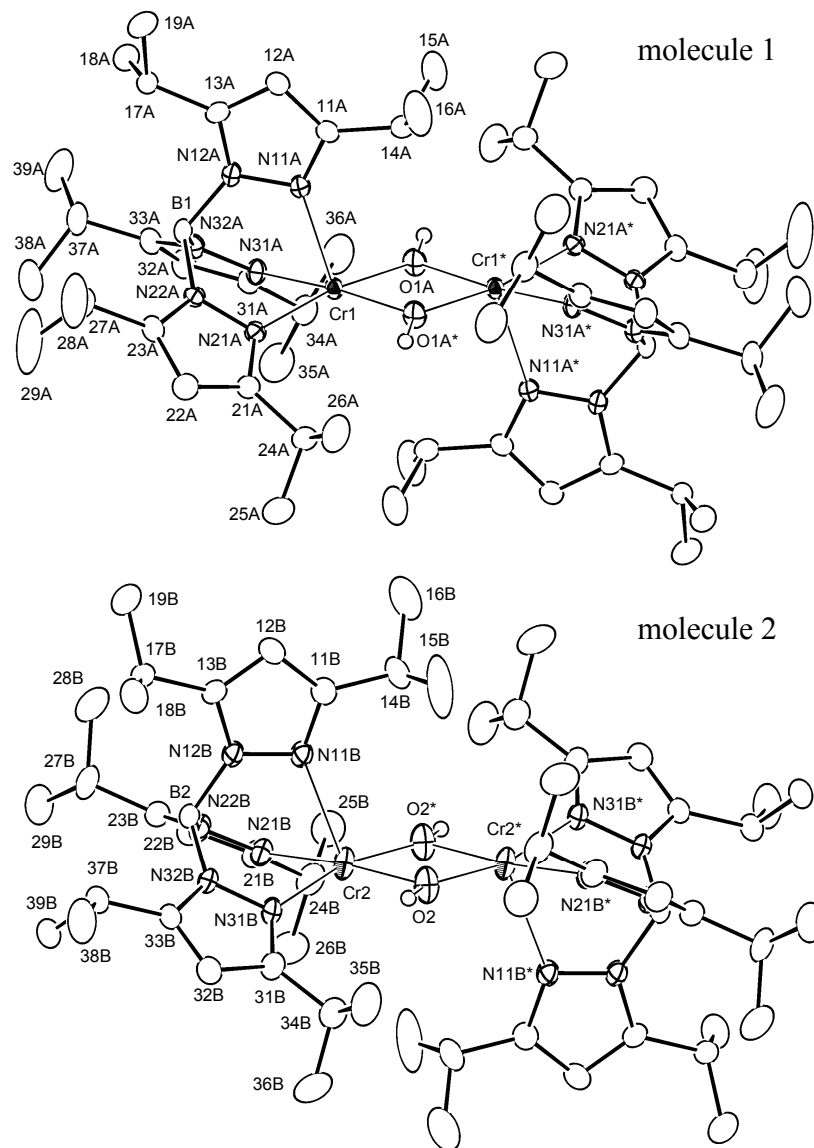

Figure S1. Atomic numbering scheme for 3.

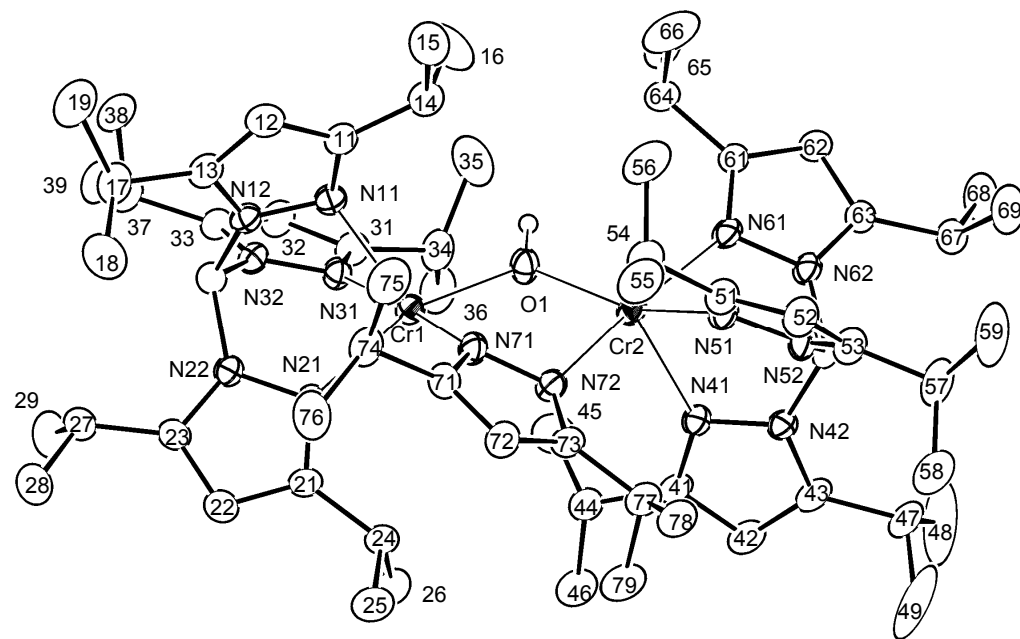

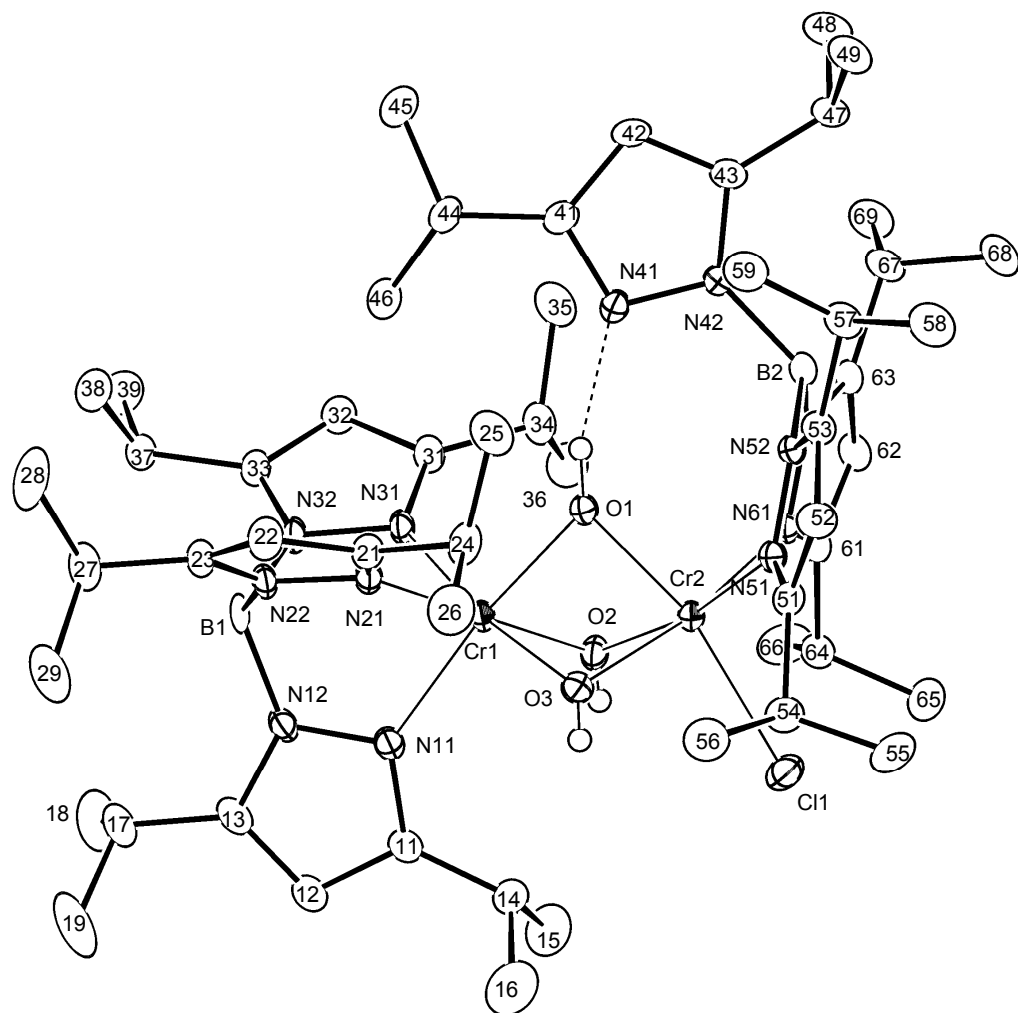

Figure S3. Atomic numbering scheme for 5.

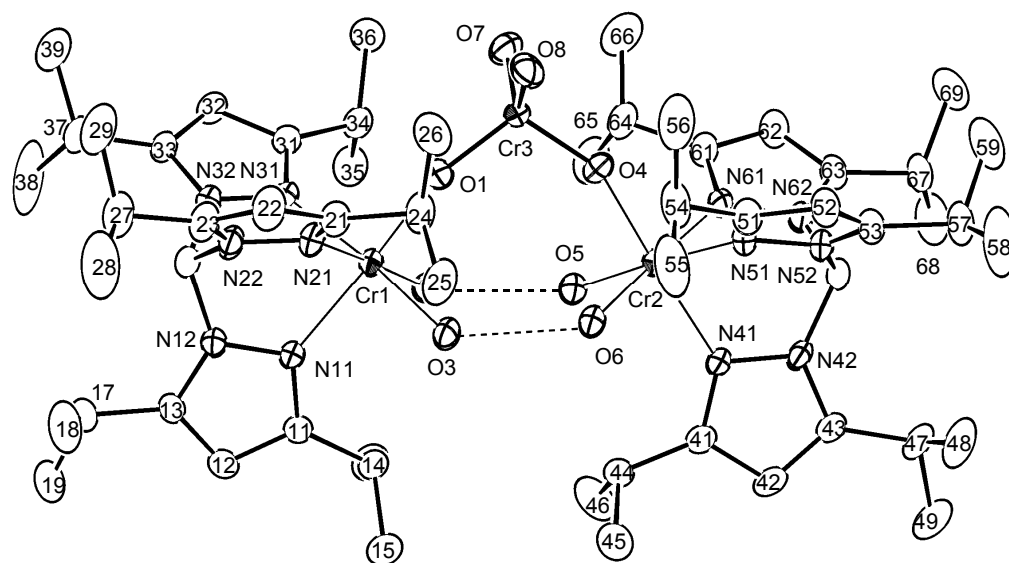

Figure S4. Atomic numbering scheme for 7.

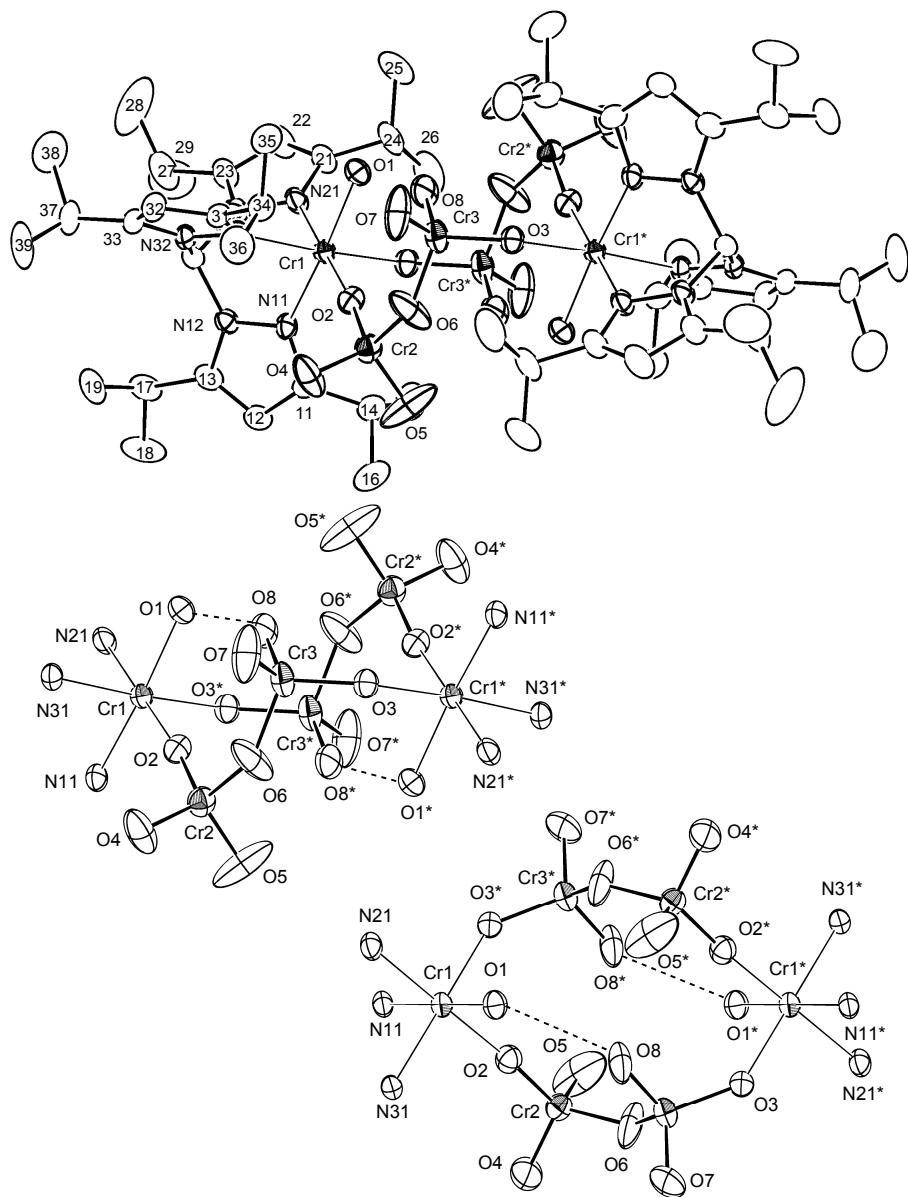

Figure S5. Atomic numbering scheme for **9**.

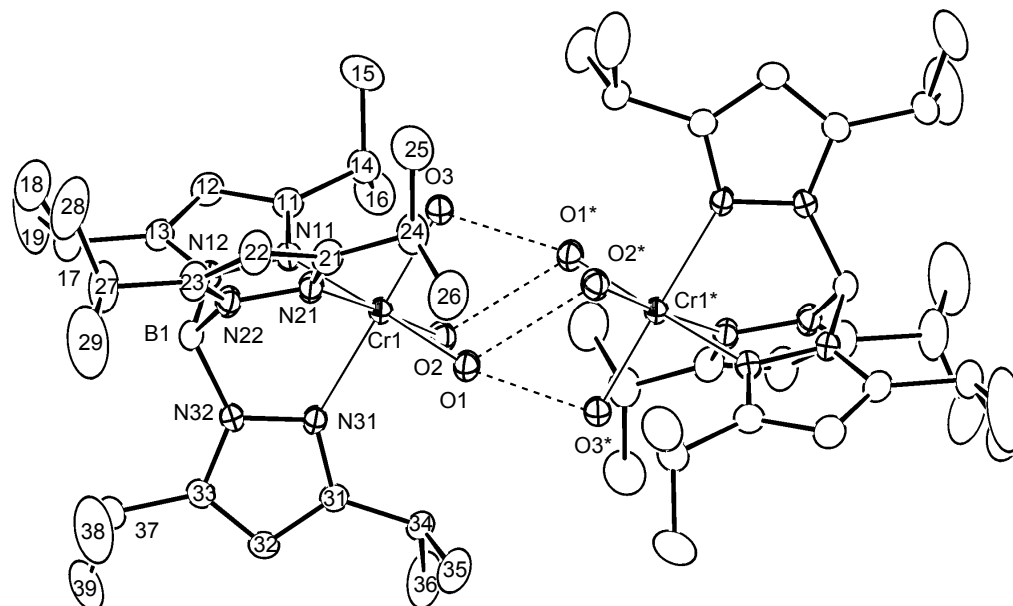

Figure S6. Atomic numbering scheme for **10**.

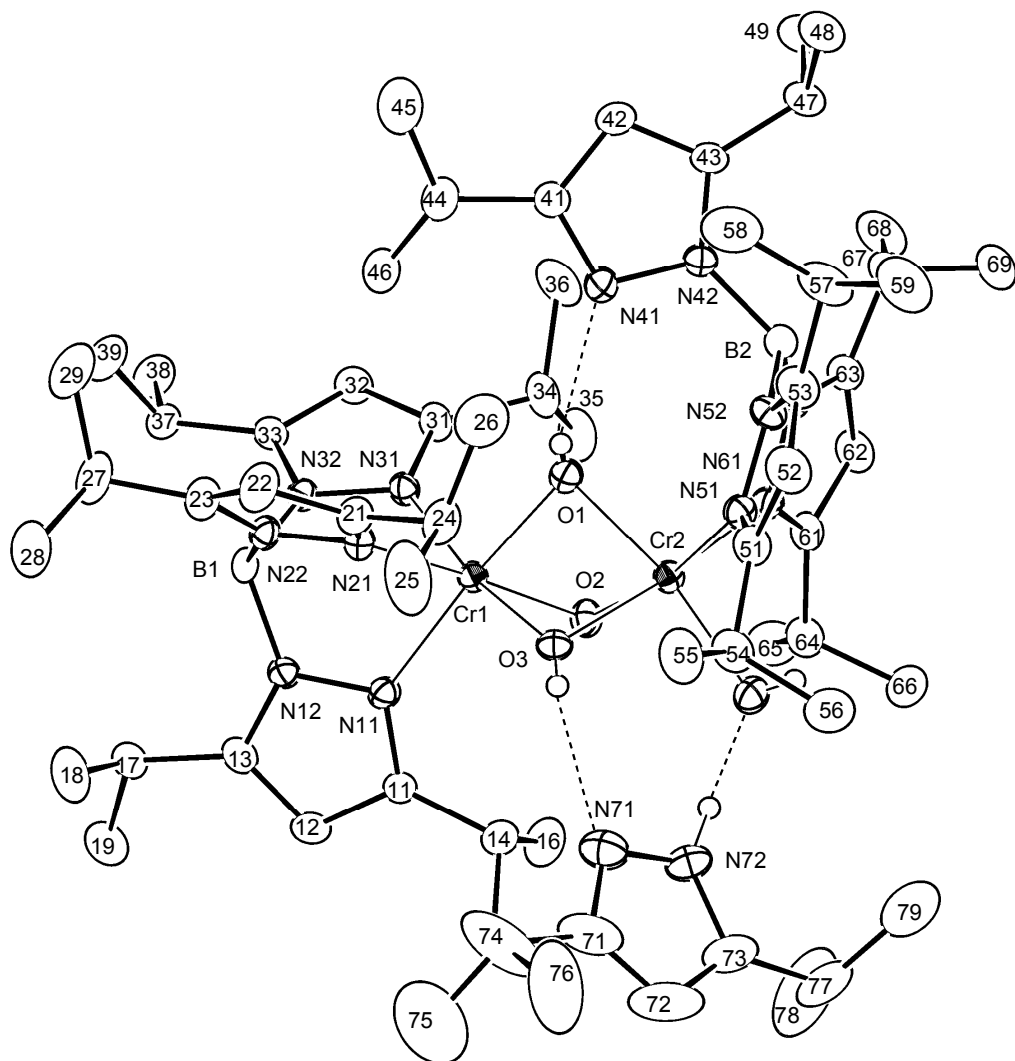

Figure S7. Atomic numbering scheme for 11.
